# Supplementary material
Source: PubMed Central journal article supplement (PMC9587375)
Supplement: mmc1.pdf [file mmc1.pdf]

**Supplemental information**

**ChAdOx1 nCoV-19 vaccine elicits monoclonal  
antibodies with cross-neutralizing activity  
against SARS-CoV-2 viral variants**

**Jeffrey Seow, Carl Graham, Sadie R. Hallett, Thomas Lechmere, Thomas J.A. Maguire, Isabella Huettner, Daniel Cox, Hataf Khan, Suzanne Pickering, Rebekah Roberts, Anele Waters, Christopher C. Ward, Christine Mant, Michael J. Pitcher, Jo Spencer, Julie Fox, Michael H. Malim, and Katie J. Doores**

**ChAdOx1 nCoV-19 (AZD1222) vaccine elicits monoclonal antibodies with potent cross-neutralizing activity against SARS-CoV-2 viral variants**

Jeffrey Seow,<sup>1\*</sup> Carl Graham,<sup>1\*</sup> Sadie R. Hallett,<sup>1</sup> Thomas Lechmere,<sup>1</sup> Thomas J.A. Maguire,<sup>1</sup> Isabella Huettner,<sup>1</sup> Daniel Cox,<sup>1</sup> Hataf Khan,<sup>1</sup> Suzanne Pickering,<sup>1</sup> Rebekah Roberts,<sup>2</sup> Anele Waters,<sup>2</sup> Christopher C. Ward,<sup>1</sup> Christine Mant,<sup>3</sup> Michael J. Pitcher,<sup>4</sup> Jo Spencer,<sup>4</sup> Julie Fox,<sup>1,2</sup> Michael H. Malim,<sup>1</sup> Katie J. Doores<sup>1#</sup>

<sup>1</sup> Department of Infectious Diseases, School of Immunology & Microbial Sciences, King's College London, London, UK.

<sup>2</sup> Harrison Wing, Guys and St Thomas' NHS Trust, London, UK.

<sup>3</sup> Infectious Diseases Biobank, Department of Infectious Diseases, School of Immunology and Microbial Sciences, King's College London, London, UK.

<sup>4</sup> Peter Gorer Department of Immunobiology, School of Immunology & Microbial Sciences, King's College London, London, UK.

\* These authors contributed equally

# Corresponding author: [katie.doores@kcl.ac.uk](mailto:katie.doores@kcl.ac.uk)

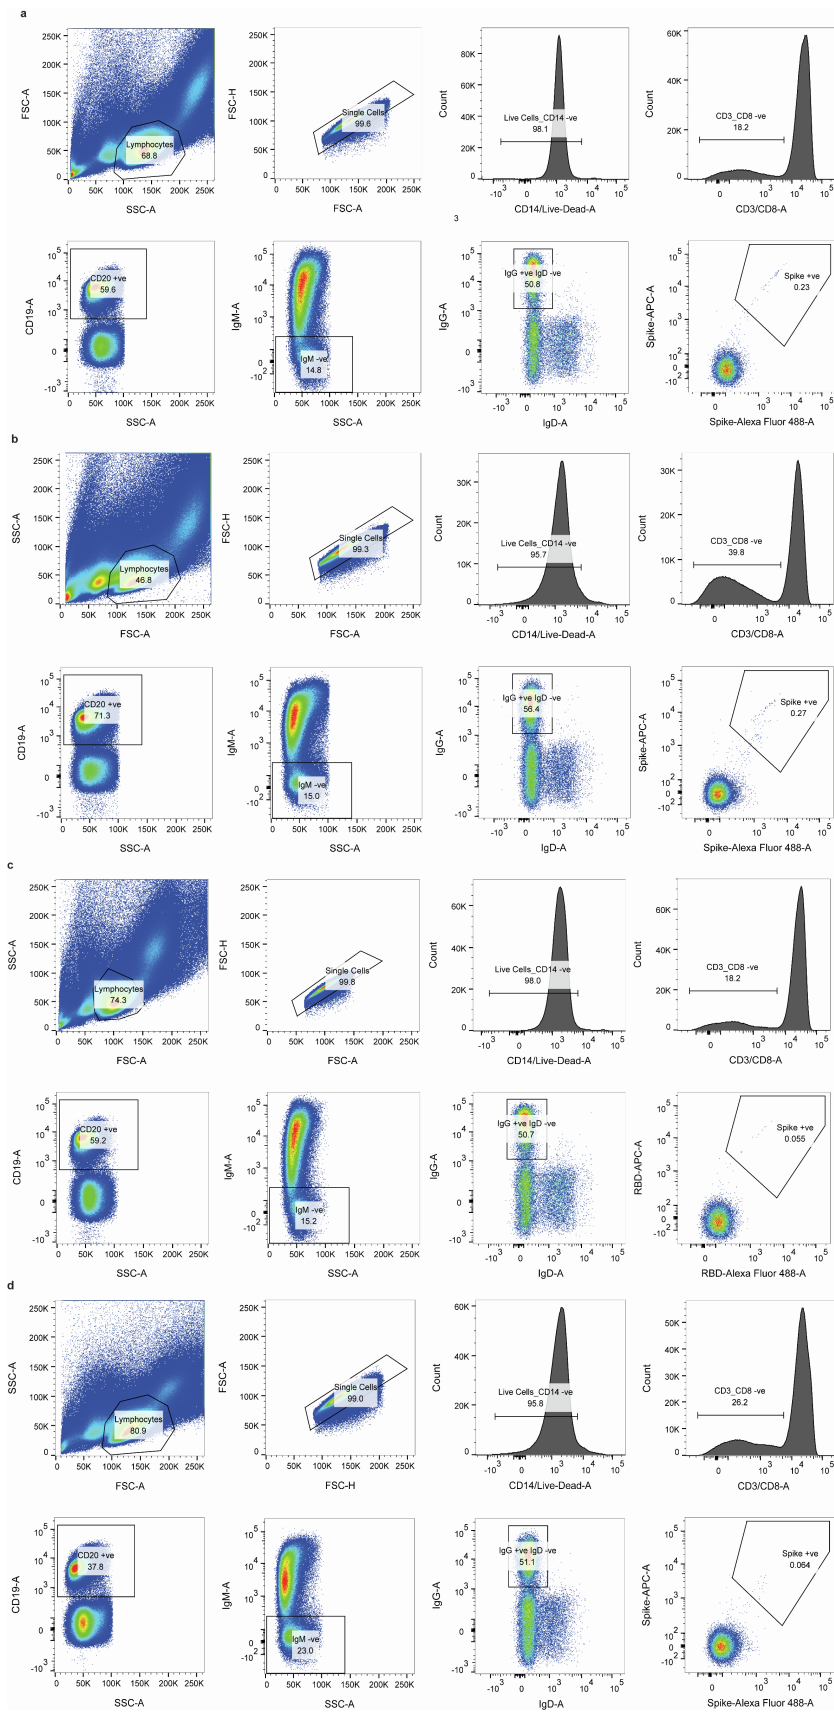

**Supplementary Figure 1: FACS sorting strategy to isolate Spike and RBD reactive mAbs following vaccination with AZD1222, related to Figure 1. Sorting of Spike reactive IgG+ B cells from VA14 at A) 4-months (TP1) and B) 9-months (TP2) post vaccine booster. C) Sorting of RBD reactive IgG+ B cells from VA14 at 4-months post vaccine booster. D) Staining of PBMC collecting pre-COVID-19 from a healthy control.**

a

| Name      | Protein + Epitope | VH-GENE  | JH-GENE | DH-GENE  | VL-GENE  | JL-GENE | CDRH3 Length | CDRL3 Length | Neutralization | % Identity Heavy | % Identity Light |
|-----------|-------------------|----------|---------|----------|----------|---------|--------------|--------------|----------------|------------------|------------------|
| VA014_09  | RBD               | IGHV1-18 | IGHJ3   | IGHD3-10 | IGKV3-11 | IGK4    | 16           | 8            | Yes            | 95.41            | 96.55            |
| VA014_50  | RBD               | IGHV1-18 | IGHJ3   | IGHD3-10 | IGKV3-11 | IGK4    | 16           | 8            | Yes            |                  |                  |
| VA014_R39 | RBD               | IGHV4-34 | IGHJ6   | IGHD4-17 | IGKV1-5  | IGKJ2   | 18           | 8            | Yes            | 87.1             | 94.36            |
| VA014_26  | RBD               | IGHV4-34 | IGHJ6   | IGHD4-17 | IGKV1-5  | IGKJ2   | 18           | 8            | Yes            |                  |                  |
| VA014_27  | RBD               | IGHV5-51 | IGHJ3   | IGHD2-2  | IGKV1-39 | IGKJ2   | 23           | 9            | Yes            | 95.38            | 95.03            |
| VA014_67  | RBD               | IGHV5-51 | IGHJ6*  | IGHD2-2  | IGKV1-39 | IGKJ2   | 23           | 9            | Yes            |                  |                  |

b

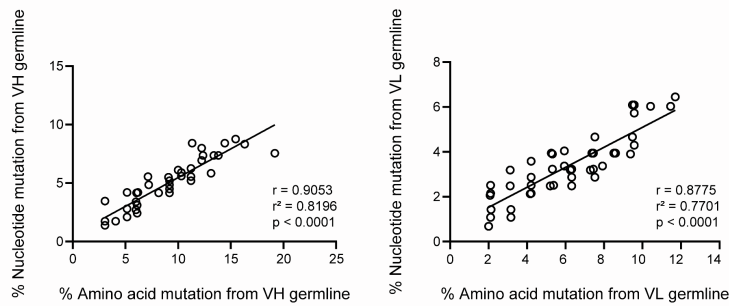

c

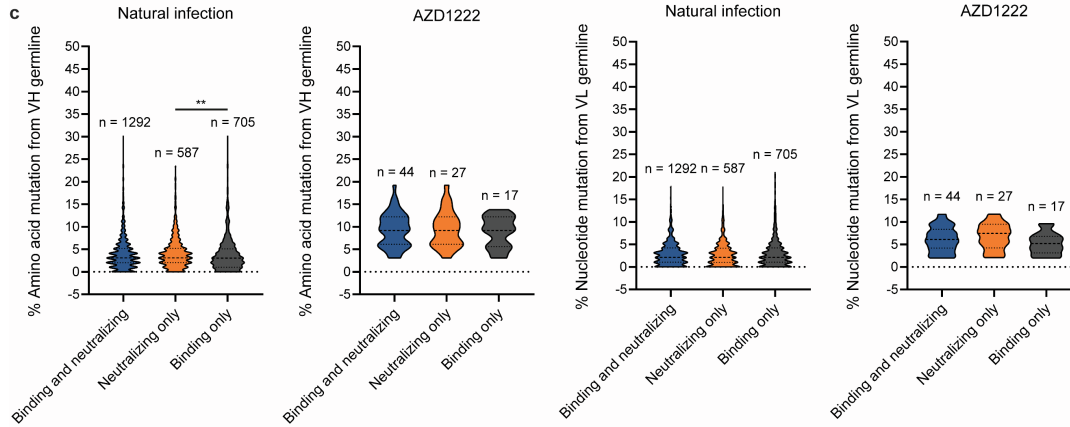

**Supplementary Figure 2: Sequence analysis of AZD1222 elicited mAbs, related to Figure 3. A)** Clonally related mAbs isolated from VA14. **B)** Correlation between the % nucleotide mutation and % amino acid mutation for VH and VL germline for AZD1222 elicited mAbs (Spearman correlation, two-tailed,  $r$ ). A linear regression was used to calculate the goodness of fit ( $r^2$ ). **C)** Divergence from germline (based on amino acid alignments) for VH and VL genes for Spike reactive mAbs arising from natural infection and AZD1222 vaccination. Spike reactive mAbs have been separated based on their binding and/or neutralizing properties. D'Agostino & Pearson tests were performed on each dataset to determine normality. Based on the result, either a Kruskal-Wallis test with Dunn's multiple comparison post hoc test or an ordinary one-way ANOVA with Turkey's multiple comparison post hoc test was performed. \* $p < 0.0332$ , \*\* $p < 0.0021$ , \*\*\* $p < 0.0002$  and \*\*\*\* $p < 0.0001$ .

### A: RBD mAbs with RBD ELISA

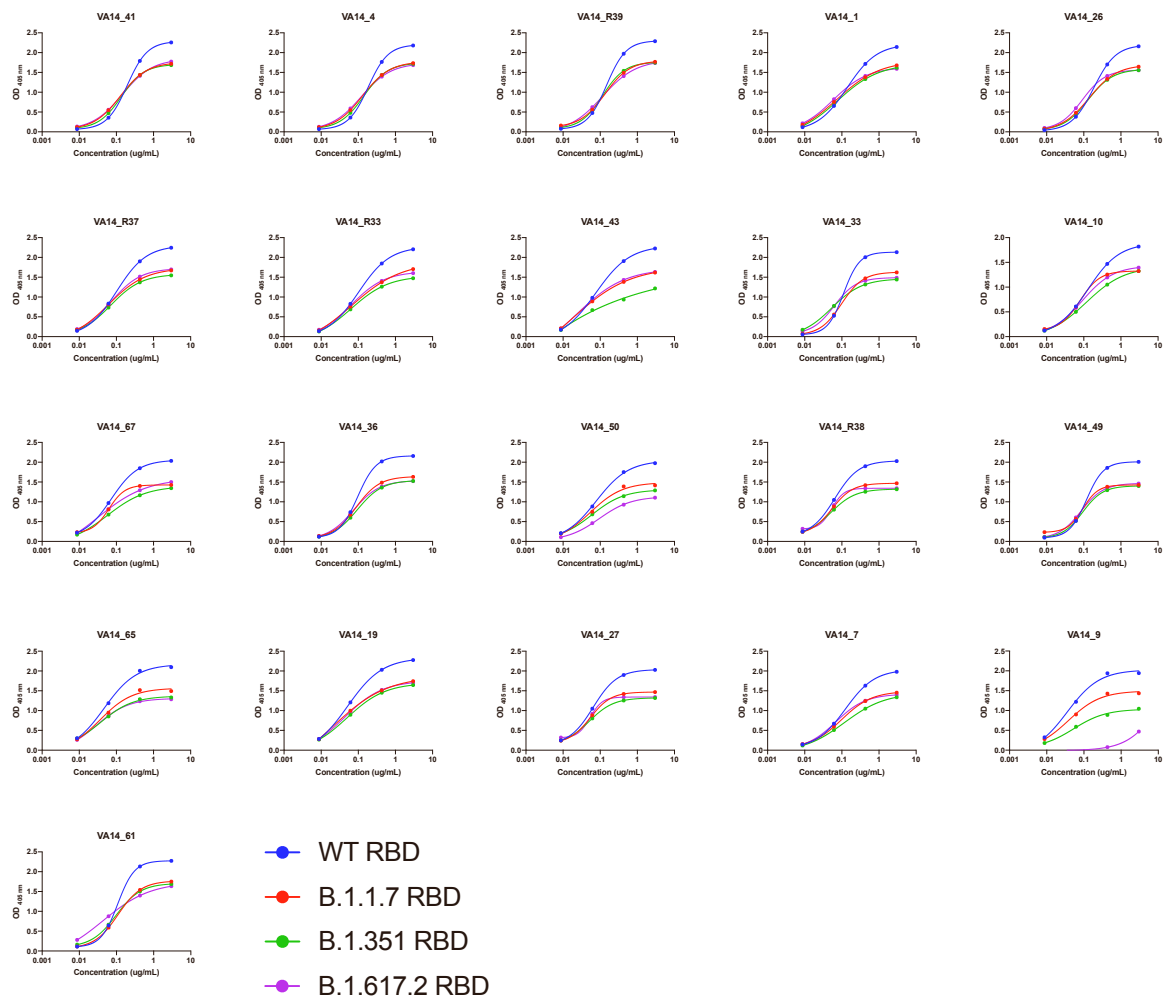

### B: NTD mAbs with S1 ELISA

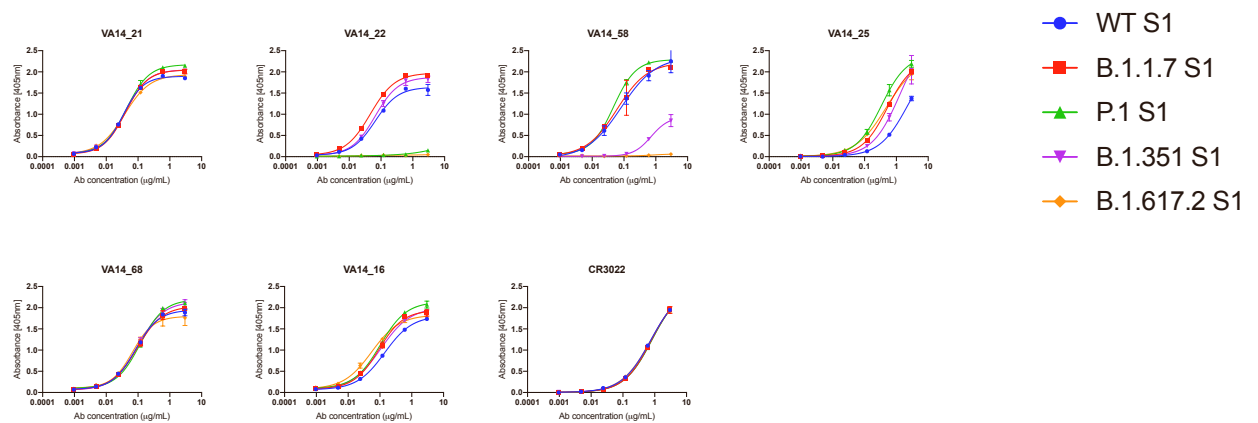

**Supplementary Figure 3: Binding of AZD1222 neutralizing antibodies to RBD or S1 from SARS-CoV-2 variants of concern, related to Figure 4 and Figure 5. A) Binding of RBD-specific nAbs to recombinant RBD from WT, alpha, beta and delta by ELISA. B) Binding of NTD-specific nAbs to recombinant S1 from WT, alpha, beta, gamma and delta by ELISA.**

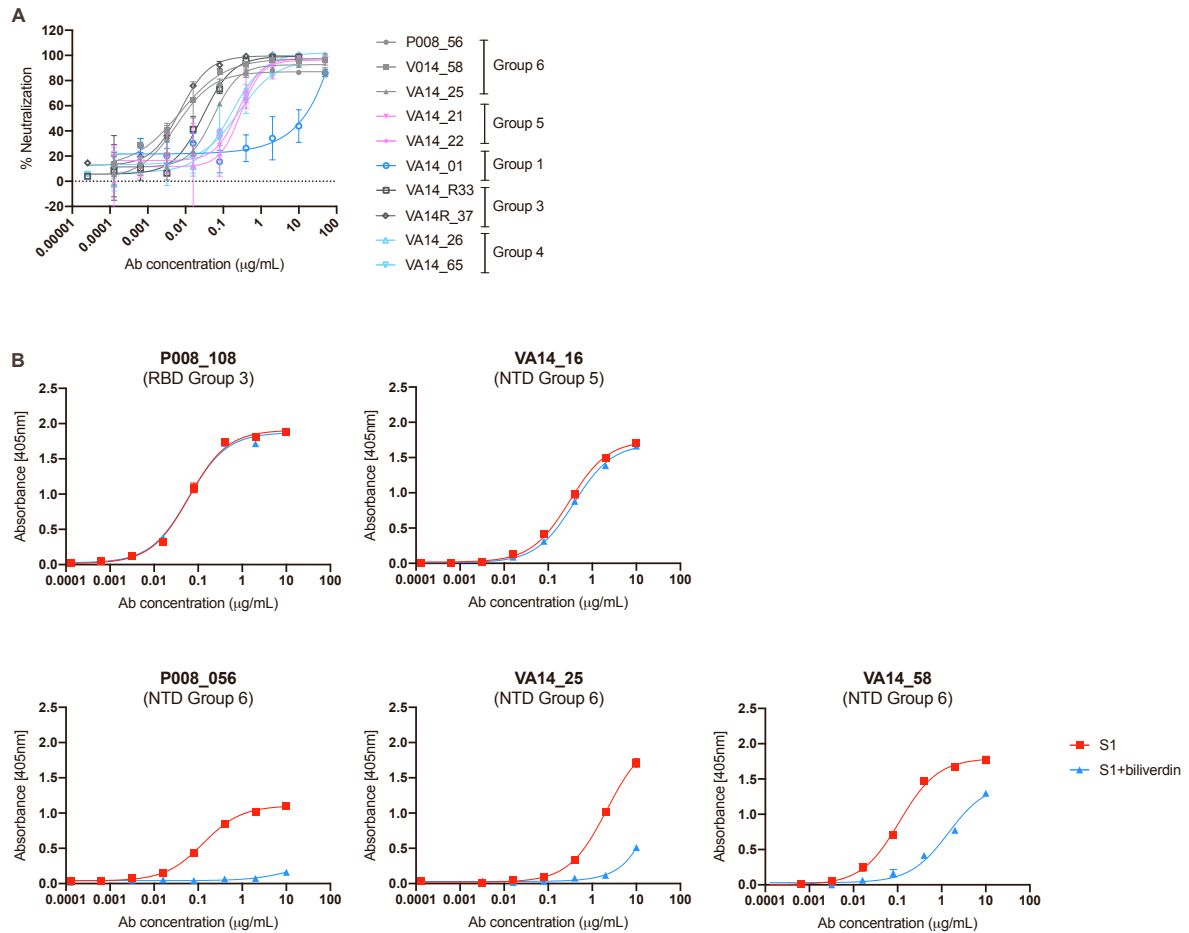

**Supplemental Figure 4: Characterisation of NTD-specific Group 6 nAbs, related to Figure 5. A)** Neutralization of SARS-CoV-2 (England 02/2020/407073) infectious virus using Vero-E6 TMPRSS2 cells. Experiments were performed in duplicate. nAbs are colour coded by group. **B)** Binding of VA14 NTD Group 6 mAbs to S1 in the presence (blue) and absence (red) of Biliverdin. RBD Group mAb P008\_108 and NTD Group 5 mAb VA14\_16 are used as negative controls. NTD Group 6 mAb P008\_056 is used as a positive control (Rosa et al., 2021).

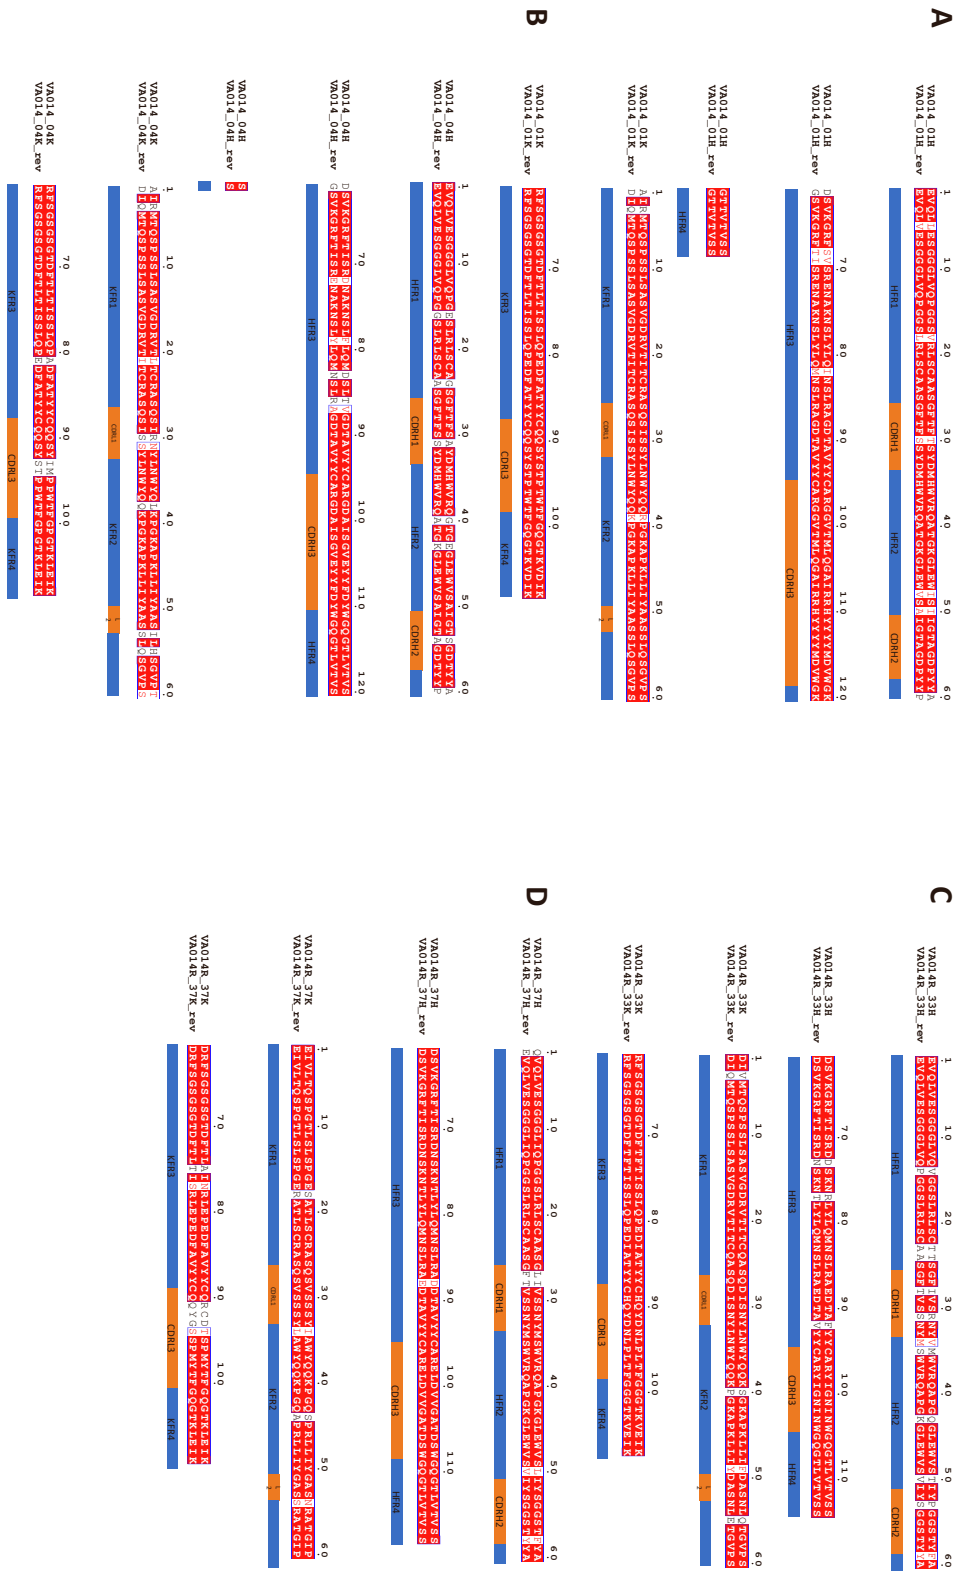

**Supplementary Figure 5: Amino acid alignments for germline reverted heavy and light chains, related to Figure 6. A) VA14\_01, B) VA14\_04, C) VA14R\_33, D) VA14R\_37.** Top germline V-gene hits were determined using the International Immunogenetics Information System (IMGT) database (Lefranc et al., 1999). The sequence alignment was determined by Clustal Omega (Sievers et al., 2011) and plotted with ESPRIT (Robert and Gouet, 2014). CDR1, 2 and 3 regions are highlighted. Related to Figure 6.

|           | WT IC <sub>50</sub> | B.1.1.7 IC <sub>50</sub> | P.1 IC <sub>50</sub> | B.1.351 IC <sub>50</sub> | B.1.617.2 IC <sub>50</sub> | B.1.1.529 IC <sub>50</sub> | ACE2 Competition | Specificity | Competition Group | VH       | VL        |
|-----------|---------------------|--------------------------|----------------------|--------------------------|----------------------------|----------------------------|------------------|-------------|-------------------|----------|-----------|
| VA014_04  | 0.42                | 0.78                     | 0.56                 | 0.65                     | 0.82                       | 5.63                       | 96               | RBD         | Group 1           | IGHV3-13 | IGKV1-39  |
| VA014_41  | 0.84                | 1.46                     | 0.69                 | 1.26                     | 1.52                       | 48.12                      | 91               | RBD         | Group 1           | IGHV3-30 | IGKV1-39  |
| VA014_01  | 7.34                | 5.18                     | 2.94                 | 8.17                     | 11.08                      | 44.68                      | 66               | RBD         | Group 1           | IGHV3-13 | IGKV1-39  |
| VA014R_39 | 0.070               | 0.091                    | 0.079                | 0.046                    | 0.055                      | >50                        | 99               | RBD         | Group 1           | IGHV4-34 | IGKV1-5   |
| VA014_26  | 0.21                | 0.17                     | 0.093                | 0.11                     | 0.11                       | >50                        | 98               | RBD         | Group 2           | IGHV4-34 | IGKV1-5   |
| VA014R_37 | 0.024               | 0.0094                   | 0.0038               | 0.0013                   | 0.018                      | 0.0020                     | 99               | RBD         | Group 3           | IGHV3-53 | IGKV3-20  |
| VA014R_33 | 0.010               | 0.020                    | 0.0040               | 0.0011                   | 0.018                      | 0.0050                     | 99               | RBD         | Group 3           | IGHV3-66 | IGKV1-33  |
| VA014_43  | 0.029               | 0.0044                   | 0.0037               | 0.0097                   | 0.017                      | 0.164                      | 99               | RBD         | Group 3           | IGHV3-53 | IGKV1-9   |
| VA014_33  | 0.056               | 0.031                    | 0.0056               | 0.0056                   | 0.013                      | 0.010                      | 90               | RBD         | Group 4           | IGHV3-74 | IGLV6-57  |
| VA014_36  | 0.025               | 0.020                    | 0.013                | 0.0062                   | 0.020                      | 1.26                       | 72               | RBD         | Group 4           | IGHV4-59 | IGKV1-33  |
| VA014_65  | 0.047               | 0.038                    | 0.047                | 0.27                     | >50                        | 0.19                       | 59               | RBD         | Group 4           | IGHV3-21 | IGKV1-39  |
| VA014_19  | 0.79                | 0.32                     | 0.24                 | 1.15                     | 0.29                       | 0.65                       | 55               | RBD         | Group 4           | IGHV3-15 | IGKV1-39  |
| VA014_49  | 3.06                | 0.91                     | 1.31                 | 3.04                     | 2.16                       | 5.98                       | 55               | RBD         | Group 4           | IGHV3-30 | IGKV1-33  |
| VA014R_38 | 0.038               | 0.040                    | 0.053                | 0.092                    | 0.040                      | 0.12                       | 45               | RBD         | Group 4           | IGHV3-43 | IGKV3-20  |
| VA014_50  | 0.031               | 0.024                    | 0.66                 | 1.39                     | >50                        | 1.01                       | 45               | RBD         | Group 4           | IGHV1-18 | IGKV3-11  |
| VA014_10  | 0.78                | 0.13                     | 3.70                 | 4.95                     | 0.25                       | 5.08                       | 45               | RBD         | Group 4           | IGHV3-23 | IGKV1-33  |
| VA014_67  | 0.029               | 0.022                    | 0.049                | 0.29                     | 0.055                      | 0.52                       | 43               | RBD         | Group 4           | IGHV5-51 | IGKV1-39  |
| VA014_07  | 0.28                | 0.19                     | 0.46                 | 1.16                     | 0.86                       | 3.08                       | 43               | RBD         | Group 4           | IGHV4-39 | IGKV3-20  |
| VA014_27  | 0.24                | 0.18                     | 0.16                 | 0.73                     | 1.98                       | 0.96                       | 34               | RBD         | Group 4           | IGHV5-51 | IGKV1-39  |
| VA014_09  | 0.027               | 0.019                    | 11.9                 | >50                      | >50                        | 13.08                      | 28               | RBD         | Group 4           | IGHV1-18 | IGKV3-11  |
| VA014_61  | 0.071               | 0.016                    | 0.0069               | 0.0060                   | 0.032                      | 0.0020                     | 96               | RBD         | Group 4           | IGHV1-69 | IGKV4-1   |
| VA014_21  | 1.22                | 0.84                     | 13.4                 | 5.17                     | 14.07                      | 3.17                       | 58               | NTD         | Group 5           | IGHV1-69 | IGKV4-1   |
| VA014_22  | 0.13                | 0.53                     | >50                  | 0.78                     | >50                        | 0.95                       | 51               | NTD         | Group 5           | IGHV3-48 | IGKV1D-12 |
| VA014_58  | >50                 | 0.0085                   | 0.026                | >50                      | >50                        | >50                        | 28               | NTD         | Group 6           | IGHV1-8  | IGKV3-11  |
| VA014_25  | >50                 | 0.052                    | 0.093                | >50                      | >50                        | >50                        | 19               | NTD         | Group 6           | IGHV1-69 | IGKV3-15  |
| VA014_47  | 0.86                | 32.37                    | >50                  | 1.38                     | 1.08                       | 0.79                       | 59               | S only      | Group 7           | IGHV3-30 | IGKV3-20  |
| VA014_16  | 0.14                | 0.051                    | 0.14                 | 0.22                     | 0.027                      | 1.59                       | 23               | NTD         | Group 8           | IGHV3-48 | IGKV1-17  |
| VA014_68  | 0.39                | 0.075                    | 10.19                | 0.48                     | 0.067                      | 1.86                       | 19               | NTD         | Group 8           | IGHV4-59 | IGKV4-1   |

**Supplementary Table S1: Binding and neutralization properties of isolated mAbs, related to Figure 2 and Figure 5.**
